# Supplementary material for: Aqueous Deficient Dry Eye Syndrome Post Orbital Radiotherapy: A 10-Year Retrospective Study
Source: PubMed Central journal article supplement — Transl Vis Sci Technol. 2017 Jun 15;6(3):19. doi: 10.1167/tvst.6.3.19 (PMC5477619; doi:10.1167/tvst.6.3.19), 2017-06-15
Supplement: tvst-06-03-17_s01.pdf [file tvst-06-03-17_s01.pdf]

**Supplementary Table 1: Age group distribution**

| Age group   | N (Controls) | N (Patients) |
|-------------|--------------|--------------|
| 0-11 years  | 5            | 10           |
| 12-50 years | 11           | 23           |
| >50 years   | 12           | 18           |

**Supplementary Table 2: Dry Eye distribution based on age groups**

| <b>Age grp</b> | <b>Total N</b> | <b>N of Events</b> | <b>Censored</b> |                |
|----------------|----------------|--------------------|-----------------|----------------|
|                |                |                    | <b>N</b>        | <b>Percent</b> |
| A              | 5              | 0                  | 5               | 100.0%         |
| B              | 11             | 1                  | 10              | 90.9%          |
| C              | 12             | 3                  | 9               | 75.0%          |
| Overall        | 28             | 4                  | 24              | 85.7%          |

**Supplementary Table 3: Kaplan Meir Survival Table for Control Population: Information Matrix**

| Age Grp | Time | Status | Cumulative Proportion Surviving at the Time |            | N of Cumulative Events | N of Remaining Cases |
|---------|------|--------|---------------------------------------------|------------|------------------------|----------------------|
|         |      |        | Estimate                                    | Std. Error |                        |                      |
| B       | 1    | 2      | .889                                        | .105       | 1                      | 8                    |
|         | 2    | 1      | .                                           | .          | 1                      | 7                    |
|         | 3    | 1      | .                                           | .          | 1                      | 6                    |
|         | 4    | 1      | .                                           | .          | 1                      | 5                    |
|         | 5    | 1      | .                                           | .          | 1                      | 4                    |
|         | 6    | 1      | .                                           | .          | 1                      | 3                    |
|         | 7    | 1      | .                                           | .          | 1                      | 2                    |
|         | 8    | 1      | .                                           | .          | 1                      | 1                    |
|         | 9    | 1      | .                                           | .          | 1                      | 0                    |
| C       | 1    | 2      | .833                                        | .152       | 1                      | 5                    |
|         | 2    | 1      | .                                           | .          | 1                      | 4                    |
|         | 3    | 1      | .                                           | .          | 1                      | 3                    |
|         | 4    | 1      | .                                           | .          | 1                      | 2                    |
|         | 5    | 2      | .417                                        | .304       | 2                      | 1                    |

| Age Grp | Time | Status | Cumulative Proportion<br>Surviving at the Time |            | N of<br>Cumulative<br>Events | N of<br>Remaining<br>Cases |
|---------|------|--------|------------------------------------------------|------------|------------------------------|----------------------------|
|         |      |        | Estimate                                       | Std. Error |                              |                            |
| B       | 1    | 2      | .889                                           | .105       | 1                            | 8                          |
|         | 2    | 1      | .                                              | .          | 1                            | 7                          |
|         | 3    | 1      | .                                              | .          | 1                            | 6                          |
|         | 4    | 1      | .                                              | .          | 1                            | 5                          |
|         | 5    | 1      | .                                              | .          | 1                            | 4                          |
|         | 6    | 1      | .                                              | .          | 1                            | 3                          |
|         | 7    | 1      | .                                              | .          | 1                            | 2                          |
|         | 8    | 1      | .                                              | .          | 1                            | 1                          |
|         | 9    | 1      | .                                              | .          | 1                            | 0                          |
| C       | 1    | 2      | .833                                           | .152       | 1                            | 5                          |
|         | 2    | 1      | .                                              | .          | 1                            | 4                          |
|         | 3    | 1      | .                                              | .          | 1                            | 3                          |
|         | 4    | 1      | .                                              | .          | 1                            | 2                          |
|         | 5    | 2      | .417                                           | .304       | 2                            | 1                          |
|         | 6    | 2      | .000                                           | .000       | 3                            | 0                          |

**Supplementary Table 4: Kaplan Meir Survival Analysis for Patient Population:  
Information Matrix**

| <b>Time Frame (Months)</b> | <b>% Patients with Dry Eye</b> |
|----------------------------|--------------------------------|
| 1.47                       | 2.10                           |
| 1.50                       | 4.20                           |
| 2.90                       | 6.20                           |
| 3.00                       | 8.30                           |
| 3.10                       | 10.40                          |
| 3.90                       | 12.60                          |
| 3.97                       | 14.80                          |
| 4.43                       | 17.00                          |
| 4.90                       | 19.30                          |
| 5.10                       | 21.60                          |
| 5.90                       | 23.90                          |
| 6.27                       | 26.20                          |
| 8.07                       | 29.10                          |
| 11.17                      | 32.10                          |
| 15.53                      | 39.20                          |
| 16.60                      | 42.80                          |
| 17.10                      | 46.40                          |
| 18.87                      | 50.20                          |
| 19.50                      | 54.40                          |
| 27.80                      | 60.10                          |
| 34.73                      | 65.80                          |
| 38.83                      | 71.50                          |
| 47.17                      | 77.20                          |

**Supplementary Table 5: Patient Data: Side effects observed post-EBRT treatment**

| <b>Diagnosis</b>                               | <b>% of Patients</b> |
|------------------------------------------------|----------------------|
| Radiation retinopathy                          | 33.4                 |
| Radiation-induced cataract                     | 24.9                 |
| Radiation keratopathy                          | 20.8                 |
| Corneal scar                                   | 4.2                  |
| Eyelid scalding                                | 4.2                  |
| Lid symblepheron                               | 4.2                  |
| Radiation-induced limbal stem cell deficiency  | 4.2                  |
| Radiation-induced periocular hyperpigmentation | 4.2                  |
| Burning sensation                              | 4.2                  |
