# Supplementary material for: Aqueous Deficient Dry Eye Syndrome Post Orbital Radiotherapy: A 10-Year Retrospective Study
Source: PubMed Central journal article supplement — Transl Vis Sci Technol. 2017 Jun 15;6(3):19. doi: 10.1167/tvst.6.3.19 (PMC5477619; doi:10.1167/tvst.6.3.19), 2017-06-15
Supplement: tvst-06-03-17_s02.pdf [file tvst-06-03-17_s02.pdf]

**Supplementary Figures**

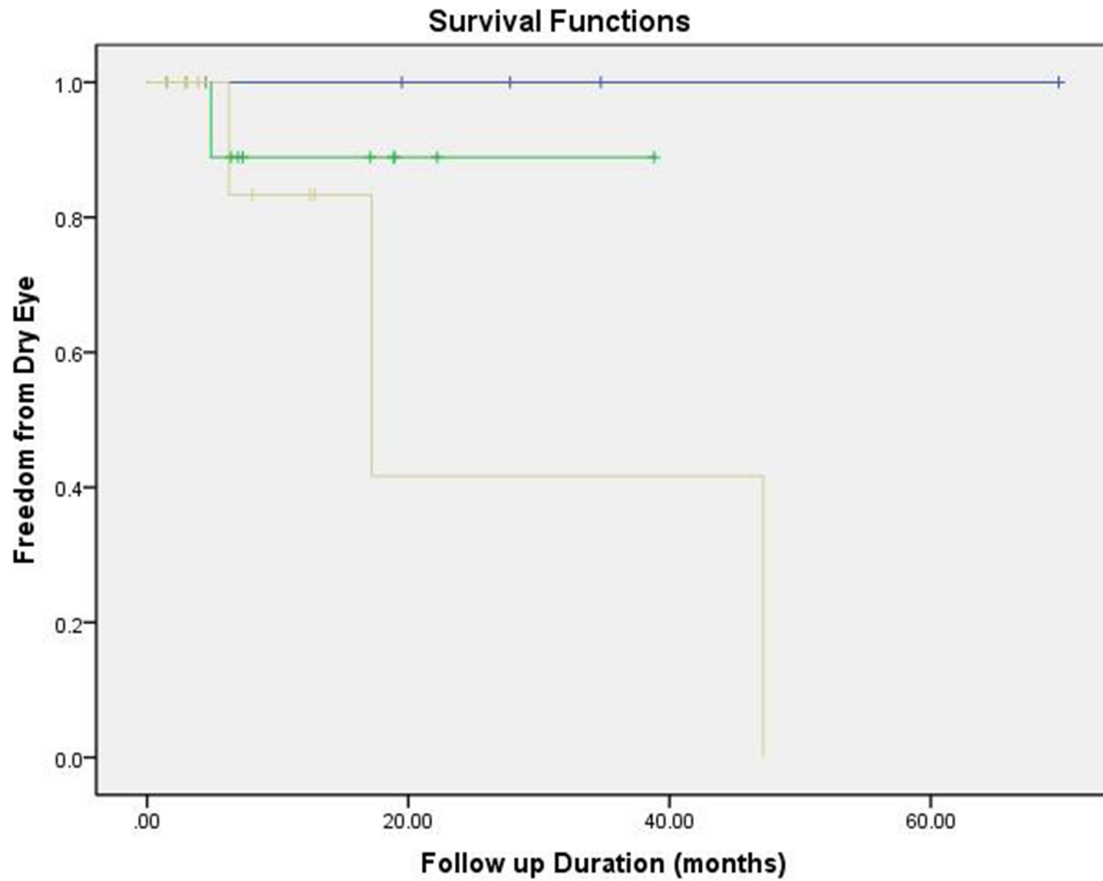

**Supplementary Figure 1: Kaplan Meier Survival Analysis for Control Population**

The Kaplan Meier survival analysis showed a 100% survival rate for age group A (0-11 yr), 90.9% for age group B (12-50) and 75% for age group C (> 50yr) during the follow up period

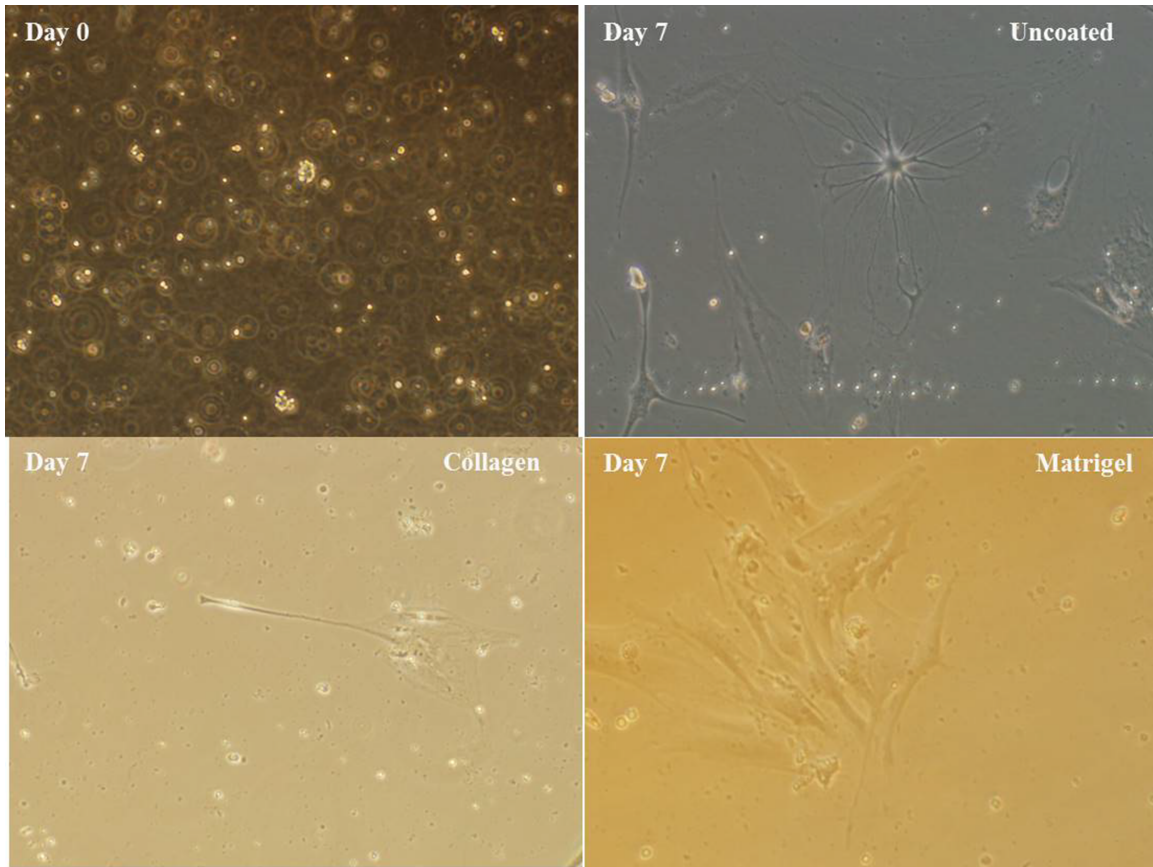

**Supplementary Figure 2: In-vitro growth of cells isolated from post-radiated human lacrimal tissue and normal human lacrimal gland**

Isolated cell suspension showed very few epithelial clumps. These cells were seeded on uncoated, collagen I and Matrigel™ coated tissue culture dishes. Some cells that do attach show spindle shaped morphology. No growth of epithelial cells was observed.
